# Supplementary material for: Tracing Autism Traits in Large Multiplex Families to Identify Endophenotypes of the Broader Autism Phenotype
Source: Int J Mol Sci. 2020 Oct 27;21(21):7965. doi: 10.3390/ijms21217965 (PMC7663259; doi:10.3390/ijms21217965)
Supplement: Supplementary file 1 [file ijms-21-07965-s001.zip]

Archive with 5 entries (4 files):
- Broader Autism Phenotype Interview v3.pdf
- __MACOSX/
- __MACOSX/._Broader Autism Phenotype Interview v3.pdf
- Supplementary_IJMS_v2.docx
- __MACOSX/._Supplementary_IJMS_v2.docx
